# Supplementary material
Source: MDPI journal article supplement (https://www.mdpi.com/2071-1050/11/21/6027)
Supplement: s1 [file s1 › sustainability-620346-supplementary.pdf]

## Supplemental tables

**Supplemental table 1** – Population characteristics for 4,313 Dutch participants aged 1-79 y derived from the Dutch National Food Consumption Survey 2012-2016.

**Supplemental table 2** – Categorization and shortened names for 16 main groups and 9 aggregated groups for analysis adapted from GloboDiet.

**Supplemental table 3** – Spearman correlation coefficients for greenhouse gas emission and acidification, fresh water eutrophication, marine eutrophication, land use and water use for 242 foods with primary life cycle analysis data.

**Supplemental table 4** – Components and recommendations (threshold and cut-off) of the Dutch Healthy Diet index 2015 and their minimum and maximum scores.

**Supplemental table 5** – Mean (standard deviation) food consumption per component of the Dutch Healthy Diet index 2015 for 2,078 Dutch men and women aged 19-79 y derived from the Dutch National Food Consumption Survey 2012-2016

**Supplemental table 6** – Environmental impact of daily diets and nutritional aspects for total population (n=4,313) aged 1-79 y derived from the Dutch National Food Consumption Survey 2012-2016.

**Table S1.** Population characteristics for 4,313 Dutch participants aged 1-79 y derived from the Dutch National Food Consumption Survey 2012-2016.<sup>a</sup>

|                                 | <b>Total population<br/>(n=4,313)</b> |               | <b>Children, 1-8y<br/>(n=1,192)</b> |               | <b>Children, 9-18y<br/>(n=1,043)</b> |               | <b>Men, 19-79y<br/>(n=1,043)</b> |               | <b>Women, 19-79<br/>(n=1,035)</b> |               |
|---------------------------------|---------------------------------------|---------------|-------------------------------------|---------------|--------------------------------------|---------------|----------------------------------|---------------|-----------------------------------|---------------|
| <b>Characteristics</b>          | <b>N, mean</b>                        | <b>(%),SD</b> | <b>N, mean</b>                      | <b>(%),SD</b> | <b>N, mean</b>                       | <b>(%),SD</b> | <b>N, mean</b>                   | <b>(%),SD</b> | <b>N, mean</b>                    | <b>(%),SD</b> |
| Gender                          |                                       |               |                                     |               |                                      |               |                                  |               |                                   |               |
| Male                            | 2165                                  | (50)          | 593                                 | (50)          | 529                                  | (51)          | 1043                             | (100)         | 0                                 | 0             |
| Female                          | 2148                                  | (50)          | 599                                 | (50)          | 514                                  | (49)          | 0                                | 0             | 1035                              | (100)         |
| Age (y)                         | 40                                    | 21            | 5                                   | 1             | 13                                   | 2             | 48                               | 21            | 48                                | 21            |
| DHD15                           |                                       |               |                                     |               |                                      |               | 51.8                             | 22.4          | 64.2                              | 23.6          |
| BMI <sup>b</sup>                |                                       |               |                                     |               |                                      |               |                                  |               |                                   |               |
| Underweight                     | 226                                   | (5)           | 92                                  | (8)           | 105                                  | (10)          | 13                               | (1)           | 16                                | (2)           |
| Normal weight                   | 2414                                  | (56)          | 973                                 | (82)          | 751                                  | (72)          | 354                              | (34)          | 336                               | (32)          |
| Overweight                      | 793                                   | (18)          | 98                                  | (8)           | 155                                  | (15)          | 293                              | (28)          | 247                               | (24)          |
| Obese                           | 361                                   | (8)           | 26                                  | (2)           | 32                                   | (3)           | 124                              | (12)          | 179                               | (17)          |
| Level of education <sup>c</sup> |                                       |               |                                     |               |                                      |               |                                  |               |                                   |               |
| Low                             | 809                                   | 19            | 73                                  | (6)           | 137                                  | (13)          | 241                              | (23)          | 358                               | (35)          |
| Moderate                        | 1607                                  | 37            | 387                                 | (32)          | 432                                  | (41)          | 406                              | (39)          | 382                               | (37)          |
| High                            | 1888                                  | 44            | 732                                 | (61)          | 468                                  | (45)          | 395                              | (38)          | 293                               | (28)          |
| Degree of urbanization          |                                       |               |                                     |               |                                      |               |                                  |               |                                   |               |
| Extremely, strongly             | 1996                                  | (46)          | 543                                 | (46)          | 475                                  | (46)          | 494                              | (47)          | 484                               | (47)          |
| Moderately                      | 871                                   | (20)          | 255                                 | (21)          | 204                                  | (20)          | 200                              | (19)          | 212                               | (20)          |
| Hardly, not                     | 1446                                  | (34)          | 394                                 | (33)          | 364                                  | (35)          | 349                              | (33)          | 339                               | (33)          |
| Region                          |                                       |               |                                     |               |                                      |               |                                  |               |                                   |               |
| West                            | 1931                                  | (45)          | 542                                 | (45)          | 481                                  | (46)          | 454                              | (44)          | 454                               | (44)          |
| North                           | 459                                   | (11)          | 129                                 | (11)          | 112                                  | (11)          | 109                              | (10)          | 109                               | (11)          |
| East                            | 949                                   | (22)          | 261                                 | (22)          | 223                                  | (21)          | 235                              | (23)          | 230                               | (22)          |
| South                           | 974                                   | (23)          | 260                                 | (22)          | 227                                  | (22)          | 245                              | (23)          | 242                               | (23)          |
| Smoking <sup>d</sup>            |                                       |               |                                     |               |                                      |               |                                  |               |                                   |               |
| Yes                             | 413                                   | (10)          |                                     |               |                                      |               | 206                              | (20)          | 207                               | (20)          |
| No                              | 1654                                  | (38)          |                                     |               |                                      |               | 831                              | (80)          | 823                               | (80)          |

SD, standard deviation; DHD15, Dutch healthy diet index 2015; BMI, body mass index

<sup>a</sup>reported values weighted for demographic properties, season and combination of both consumption days.

<sup>b</sup>,BMI not obtained for adults  $\geq 71$  y <sup>c</sup>missing data for 9 participants, <sup>d</sup>missing data for 11 participants

**Table S2.** Categorization and shortened names for 16 main groups and 9 aggregated groups for analysis adapted from GloboDiet.

| Main groups                                       | Aggregated groups              | GloboDiet groups                                                                                                    |
|---------------------------------------------------|--------------------------------|---------------------------------------------------------------------------------------------------------------------|
| Animal based foods                                |                                |                                                                                                                     |
| Meat total                                        | Meat, fish and eggs            | '07' Meat and meat products (excl. '07-06' meat replacers)                                                          |
| Red processed meat                                | Meat, fish and eggs            | '07-04' Meat products and processed meat and 'red' <sup>a</sup>                                                     |
| Red unprocessed meat                              | Meat, fish and eggs            | '07-00' Meat miscellaneous; '07-01' Fresh meat; '07-03' Game and '07-05' Oval meat                                  |
| White processed meat                              | Meat, fish and eggs            | '07-04' Meat products and processed meat and 'white' <sup>1</sup>                                                   |
| White unprocessed meat                            | Meat, fish and eggs            | '07-02' Poultry                                                                                                     |
| Dairy                                             | Dairy and cheese               | '05' Dairy (excl. '05-05' Cheese; '05-02' Dairy replacers and '05-07-02', '05-08-02' both non-dairy based products) |
| Dairy drinks                                      | Dairy and cheese               | '05-01' Dairy drinks                                                                                                |
| Cheese                                            | Dairy and cheese               | '05-05' Cheese                                                                                                      |
| Fish                                              | Meat, fish and eggs            | '08' Fish, shellfish and amphibians                                                                                 |
| Eggs                                              | Meat, fish and eggs            | '09' Eggs and egg products                                                                                          |
| Plant-based foods                                 |                                |                                                                                                                     |
| Potatoes and cereals                              | Potatoes and cereals           | '01' Potatoes and other tubers and '06' Cereals and cereal products                                                 |
| Vegetables                                        | Vegetables, fruits and legumes | '02' Vegetables                                                                                                     |
| Fruits                                            | Vegetables, fruits and legumes | '04' Fruits, olives (excl. 04.02)                                                                                   |
| Nuts and seeds                                    | Nuts and seeds                 | '04-02' Nuts, peanuts, seeds and nut spread                                                                         |
| Legumes                                           | Vegetables, fruits and legumes | '03' Legumes                                                                                                        |
| Beverages                                         |                                |                                                                                                                     |
| Non-alcoholic beverages                           | Non-alcoholic beverages        | '13' Non-alcoholic beverages                                                                                        |
| Soft drinks                                       | Non-alcoholic beverages        | '13-02' Lemonade, soft drinks                                                                                       |
| Coffee and tea                                    | Non-alcoholic beverages        | '13-03' Coffee, tea and herbal tea                                                                                  |
| Fruit and vegetable juice                         | Non-alcoholic beverages        | '13-01' Fruit and vegetable juice                                                                                   |
| Water                                             | Non-alcoholic beverages        | '13-04' Water                                                                                                       |
| Alcoholic beverages                               | Alcoholic beverages            | '14' Alcoholic beverages                                                                                            |
| Miscellaneous                                     |                                |                                                                                                                     |
| Sugar, confectionery, cakes, biscuits and savoury | Miscellaneous                  | '11' Sugar and confectionery; '12' Cakes and sweet biscuits and '18' Savoury snacks.                                |
| Fats and oils                                     | Fats and oils                  | '10' Fats and oils                                                                                                  |
| Broth, sauces and                                 | Miscellaneous                  | '15' Condiments, spices, sauces and yeast and '16'                                                                  |

condiments

Other

Miscellaneous

Soups and stocks

'17' Miscellaneous; '07-06' meat replacers; '05-02'  
Dairy replacers and '05-07-02', '05-08-02' both

non-dairy based products

---

<sup>a</sup> GloboDiet group '07-04' Processed meat was categorized as red or white meat. Poultry was considered as white meat, remaining meats were categorized as red meat.

**Table S3.** Spearman correlation coefficients for greenhouse gas emission and acidification, fresh water eutrophication, marine eutrophication, land use and water use for 242 foods with primary life cycle analysis data.

| <b>Environmental impact indicator</b>     | <b><math>\rho^a</math></b> | <b><math>p</math>-value</b> |
|-------------------------------------------|----------------------------|-----------------------------|
| GHG emission (kg CO <sub>2</sub> -eq/kg)  | 1.00                       |                             |
| Acidification (kg SO <sub>2</sub> -eq/kg) | 0.86                       | <0.0001                     |
| Fresh water eutrophication (kg P-eq/kg)   | 0.72                       | <0.0001                     |
| Marine eutrophication (kg N-eq/kg)        | 0.75                       | <0.0001                     |
| Land use (m <sup>2</sup> * year/kg)       | 0.70                       | <0.0001                     |
| Water use (m <sup>3</sup> /kg)            | 0.51                       | <0.0001                     |

GHG, greenhouse gas, CO<sub>2</sub>-eq, carbon dioxide equivalents; SO<sub>2</sub>-eq, sulfur dioxide; P, phosphor equivalents; N-eq, nitrogen equivalents;

<sup>a</sup>Correlations based on primary life cycle assessment data per kg foods

**Table S4** Components and recommendations (threshold and cut-off) of the Dutch Healthy Diet index 2015 and their minimum and maximum scores.

| Component                            | Dutch dietary guidelines 2015                                                                               | Minimum score ( 0 points)                                                                                                        | Maximum score (10 points)                                                                                            |
|--------------------------------------|-------------------------------------------------------------------------------------------------------------|----------------------------------------------------------------------------------------------------------------------------------|----------------------------------------------------------------------------------------------------------------------|
| Vegetables                           | Eat at least 200 g of vegetables daily                                                                      | 0 g/d                                                                                                                            | ≥200 g/d                                                                                                             |
| Fruit                                | Eat at least 200 g of fruit daily                                                                           | 0 g/d                                                                                                                            | ≥200 g/d                                                                                                             |
| Wholegrain products <sup>a</sup>     | a.Eat at least 90 g of wholegrain products daily                                                            | 0 g/d                                                                                                                            | ≥90 g/d                                                                                                              |
|                                      | b.Replace refined cereal products by wholegrain products                                                    | No consumption of wholegrain products OR Ratio of wholegrains to refined grains ≤0.7                                             | No consumption of refined products OR ratio of whole grains to refined grains ≥11                                    |
| Legumes                              | Eat legumes daily                                                                                           | 0 g/d                                                                                                                            | ≥10 g/d                                                                                                              |
| Nuts                                 | Eat at least 15 g of unsalted nuts daily                                                                    | 0 g/d                                                                                                                            | ≥15 g/d                                                                                                              |
| Dairy <sup>b</sup>                   | Eat a few portions dairy products daily, including milk or yoghurt                                          | 0 g/d OR ≥ 750 g/d                                                                                                               | 300-450 g/d                                                                                                          |
| Fish <sup>c</sup>                    | Eat one serving of fish weekly, preferably oily fish                                                        | 0 g/d                                                                                                                            | ≥15 g/d                                                                                                              |
| Tea                                  | Drink three cups of black or green tea daily                                                                | 0 g/d                                                                                                                            | ≥450 g/d                                                                                                             |
| Fats and oils                        | Replace butter, hard margarines and cooking fats by soft margarines, liquid cooking fats and vegetable oils | No consumption of soft margarines, liquid cooking fats and vegetables oils OR ratio of liquid cooking fats to solid cooking ≤0.6 | No consumption of butter, hard margarines and cooking fats OR ratio of liquid cooking fats to solid cooking fats ≥13 |
| Coffee <sup>d</sup>                  | Replace unfiltered coffee by filtered coffee                                                                | Any consumption of unfiltered coffee                                                                                             | Consumption of only filtered coffee OR no coffee consumption                                                         |
| Red meat                             | Limit consumption of red meat                                                                               | ≥100 g/d                                                                                                                         | ≤45 g/d                                                                                                              |
| Processed meat                       | Limit consumption of processed meat                                                                         | ≥50 g/d                                                                                                                          | 0 g/d                                                                                                                |
| Sweetened beverages and fruit juices | Limit consumption of sweetened beverages and fruit juices                                                   | ≥250 g/d                                                                                                                         | 0 g/d                                                                                                                |
| Alcohol                              | If alcohol is consumed at all, intake should be limited to one Dutch unit (10 g ethanol) daily              | Women ≥20 g ethanol/day<br>Men ≥30 g ethanol /day                                                                                | Women ≤10 g ethanol/d<br>Men ≤10 g ethanol/d                                                                         |
| Salt                                 | Limit consumption of table salt to 6 g daily                                                                | ≥3-8 g Na/d                                                                                                                      | ≤1.9 g/d                                                                                                             |

<sup>a</sup>This component comprises two sub-components (a and b) and each sub-component has a maximum score of 5 points. <sup>b</sup>A maximum of 40 g cheese can be included.

<sup>c</sup>A maximum of 4 g lean fish can be included. <sup>d</sup>No information was gathered with regard to coffee consumption therefore this component is excluded. Source: Looman, M., Feskens, E. J., de Rijk, M., Meijboom, S., Biesbroek, S., Temme, E. H., ... & Geelen, A. (2017). Development and evaluation of the Dutch Healthy Diet index 2015. Public Health Nutrition, 1-11.

**Table S5.** Mean (standard deviation) food consumption per component of the Dutch Healthy Diet index 2015 for 2,078 Dutch men and women aged 19-79 y derived from the Dutch National Food Consumption Survey 2012-2016<sup>a</sup>.

| <b>DHD15 component</b>                          | <b>Men, 19-79y<br/>(n=1,043)</b> |           | <b>Women, 19-79y<br/>(n=1,035)</b> |           |
|-------------------------------------------------|----------------------------------|-----------|------------------------------------|-----------|
|                                                 | <b>Mean</b>                      | <b>SD</b> | <b>Mean</b>                        | <b>SD</b> |
| Red meat (g/day)                                | 96                               | 90        | 64                                 | 66        |
| Processed meat (g/day)                          | 59                               | 69        | 40                                 | 51        |
| Dairy (g/day)                                   | 241                              | 313       | 204                                | 257       |
| Cheese (g/day)                                  | 40                               | 45        | 33                                 | 36        |
| Fish (total) (g/day)                            | 8                                | 29        | 7                                  | 28        |
| Fatty fish (g/day)                              | 7                                | 28        | 7                                  | 28        |
| Lean fish (g/day)                               | 1                                | 2         | 1                                  | 2         |
| Wholegrain products(g/day)                      | 109                              | 109       | 82                                 | 79        |
| Refined grain products(g/day)                   | 124                              | 135       | 85                                 | 92        |
| Vegetables (g/day)                              | 142                              | 119       | 147                                | 136       |
| Fruit(g/day)                                    | 100                              | 147       | 125                                | 171       |
| Nuts (g/day)                                    | 3                                | 15        | 3                                  | 12        |
| Legumes (g/day)                                 | 5                                | 26        | 5                                  | 29        |
| Tea (g/day)                                     | 242                              | 482       | 509                                | 749       |
| Sweetened beverages and fruit juices<br>(g/day) | 380                              | 605       | 252                                | 427       |
| Alcohol(g/day)                                  | 17                               | 29        | 6                                  | 16        |
| Fat, solid(g/day)                               | 16                               | 20        | 11                                 | 13        |
| Fat, liquid(g/day)                              | 13                               | 18        | 10                                 | 14        |
| Sodium(mg/day)                                  | 2885                             | 1296      | 2172                               | 973       |

SD, standard deviation;DHD15, Dutch Healthy Diet index 2015.

<sup>a</sup> reported values weighted for demographic properties, season and combination of both consumption days.

**Table S6.** Environmental impact of daily diets and nutritional aspects for total population (n=4,313) aged 1-79 y derived from the Dutch National Food Consumption Survey 2012-2016<sup>a</sup>.

| <b>Environmental indicator</b>             | <b>Mean</b> | <b>SD</b> | <b>P5</b> | <b>P25</b> | <b>P50</b> | <b>P75</b> | <b>P95</b> |
|--------------------------------------------|-------------|-----------|-----------|------------|------------|------------|------------|
| GHG emission (kg CO <sub>2</sub> -eq/day)  | 4.96        | 1.99      | 2.37      | 3.63       | 4.69       | 5.94       | 8.35       |
| Land use (m <sup>2</sup> * year/day)       | 2.91        | 1.11      | 1.35      | 2.16       | 2.76       | 3.51       | 4.91       |
| Water use (m <sup>3</sup> /day)            | 0.14        | 0.08      | 0.05      | 0.09       | 0.12       | 0.18       | 0.30       |
| Acidification (kg SO <sub>2</sub> -eq/day) | 0.049       | 0.029     | 0.019     | 0.031      | 0.044      | 0.060      | 0.096      |
| Marine eutrophication (kg N-eq/day)        | 0.0083      | 0.0051    | 0.0034    | 0.0053     | 0.0074     | 0.0101     | 0.0161     |
| Fresh water eutrophication (kg P-eq/day)   | 0.0004      | 0.0002    | 0.0002    | 0.0003     | 0.0003     | 0.0004     | 0.0006     |
| <b>Nutritional aspects</b>                 |             |           |           |            |            |            |            |
| Quantity(g/day)                            | 3053        | 989       | 1553      | 2370       | 2984       | 3630       | 4760       |
| Energy(kcal/day)                           | 2126        | 717       | 1167      | 1636       | 2015       | 2531       | 3435       |
| Carbohydrates(g/day)                       | 236         | 84        | 123       | 180        | 226        | 280        | 383        |
| Fat(g/day)                                 | 84          | 36        | 37        | 59         | 79         | 104        | 148        |
| Protein(g/day)                             | 79          | 28        | 40        | 60         | 75         | 93         | 128        |
| Animal protein(g/day)                      | 48          | 22        | 18        | 33         | 45         | 60         | 88         |
| Vegetable protein(g/day)                   | 30          | 12        | 15        | 22         | 29         | 36         | 53         |
| Fibre(g/d)                                 | 20          | 7         | 10        | 15         | 19         | 24         | 33         |

SD, standard deviation; P, percentile; GHG, greenhouse gas; CO<sub>2</sub>-eq, carbon dioxide equivalents; SO<sub>2</sub>-eq, sulfur dioxide ; N-eq, nitrogen equivalents; P, phosphor equivalents.

<sup>a</sup> reported values weighted for demographic properties, season and combination of both consumption days
